# Supplementary material for: Understanding the role of regulatory flexibility and context sensitivity in preventing burnout in a palliative home care team
Source: PLoS One. 2020 May 18;15(5):e0233173. doi: 10.1371/journal.pone.0233173 (PMC7233554; doi:10.1371/journal.pone.0233173)
Supplement: S1 Database — (XLSX) [file pone.0233173.s001.xlsx]

## Sheet: Foglio1
Gender	Age	Profession_type	Work_experience	it_1_EE	it_2_EE	it_3_EE	it_6_EE	it_8_EE	it_13_EE	it_14_EE	it_16_EE	it_20_EE	EE_MBI	it_4_PA	it_7_PA	it_9_PA	it_12_PA	it_17_PA	it_18_PA	it_19_PA	it_21_PA	PA_MBI	it_5_DP	it_10_DP	it_11_DP	it_15_DP	it_22_DP	DP_MBI	FREE_1_EN_POS	FREE_2_EN_POS	FREE_3_EN_POS	FREE_4_EN_POS	FREE_MEDIA_E_POS	FREE_5_EN_NEG	FREE_6_EN_NEG	FREE_7_EN_NEG	FREE_8_EN_NEG	FREE_MEDIA_E_NEG	FREE_9_SU_POS	FREE_10_SU_POS	FREE_11_SU_POS	FREE_12_SU_POS	FREE_MEDIA_S_POS	FREE_13_SU_NEG	FREE_14_SU_NEG	FREE_15_SU_NEG	FREE_16_SU_NEG	FREE_MEDIA_S_NEG	MEDIA_MEDIE_E
2	28	3	9	3	2	1	0	0	0	0	0	0	6	5	6	6	5	6	6	5	6	45	0	0	0	0	0	0	2	5	5	4	4	4	2	5		3.67	4	2	2	3	2.75	5	5	3	5	4.5	3.83
2	42	4	7	4	4	3	2	1	1	2	0	1	18	6	5	6	5	6	5	5	6	44	0	6	0	0	1	7	5	5	5	4	4.75	5	5	5	4	4.75	5	5	3	4	4.25	5	5	5	3	4.5	4.75
1	32	5	6	3	2	2	3	2	2	1	2	0	17	5	5	5	5	6	5	5	5	41	0	0	0	0	1	1	6	6	6	3	5.25	4	3	2	5	3.5	4	2	2	3	2.75	2	6	4	5	4.25	4.38
1	22	1	8	0	0	0	0	0	0	0	0	0	0	1	6	6	6	6	6	6	5	42	0	0	0	0	0	0	3	6	6	4	4.75	5	4	3	3	3.75	4	6	6	5	5.25	2	1	3	6	3	4.25
1	28	3	10	2	4	4	0	1	0	5	1	0	17	3	6	6	5	6	6	6		38	0	0	0	2	0	2	4	6	5	4	4.75	5	3	4	3	3.75	3	3	3	3	3	2	3	2	4	2.75	4.25
2	29	1	5	5	5	5	0	0	0	0	0	0	15	5	6	6	6	6	6	6	6	47	0	0	1	0	0	1	3	4	4	4	3.75	4	4	4	4	4	3	4	4	4	3.75	3	3	4	3	3.25	3.88
2	59	5	4	4	1	3	1	2	0	1	0	2	14	4	2	4	6	6	6	5	5	38	0	0	0	0	0	0	3	3	3	3	3	3	3	3	3	3	5	4	2	2	3.25	4	3	4	4	3.75	3
1	60	3	17	2	3	1	1	1	1	2	0	1	12	5	5	2	5	5	6	6	6	40	0	0	0	0	1	1	3	5	5	4	4.25	3	2	3	1	2.25	5	5	5	5	5	5	3	4	5	4.25	3.25
1	29	3	10	3	3	5	3	3	3	5	3	2	30	3	5	3	3	5	1	5	4	29	0	1	1	1	4	7	5	5	5	4	4.75	3	2	2	4	2.75	5	5	4	3	4.25	5	5	4	6	5	3.75
2	34	1	1	0	0	0	0	0	0	0	0	0	0	4	5	6	6	6	6	6	6	45	0	0	0	0	0	0	6	6	6	5	5.75	5	4	5	3	4.25	5	5	5	5	5	5	5	4	4	4.5	5
1	25	3	9	0	2	0	0	0	0	0	6	5	13	4	6	6	6	6	6	0	6	40	0	0	2	0	0	2	5	5	5	5	5	5	4	1	4	3.5	4	5	4	3	4	3	2	2	5	3	4.25
1	47	4	10	0	1	0	0	0	0	0	0	0	1	6	6	1	6	6	0	6	6	37	0	0	0	0	0	0	4	6	6	4	5	6	4	5	5	5	6	5	6	6	5.75	5	6	6	5	5.5	5
1	42	1	17	0	0	0	0	0	0	0	0	0	0	6	6	6	6	0	6	6	6	42	0	0	0	0	0	0	1	1	1	4	1.75	3	6	6	4	4.75	6	6	6	6	6	4	4	4	4	4	3.25
1	32	5	12	2	3	2	3	2	2	2	4	2	22	3	4	2	3	3	3	3	2	23	3	3	3	2	2	13	5	5	5	4	4.75	5	5	5	4	4.75	5	2	3	4	3.5	3	2	2	4	2.75	4.75
2	42	4	7	4	4	3	2	1	1	2	0	1	18	6	5	6	5	6	5	5	6	44	0	6	0	0	1	7	5	5	5	4	4.75	5	5	5	4	4.75	5		3		4	5	5	5		5	4.75
2	37	4	36	5	5	5	1	1	4	3	0	3	27	5	6	6	5	5	4	3	6	40	0	5	0	0	0	5	4	6	5	6	5.25	5	4	4	3	4	4	5	4	4	4.25	5	4	6	5	5	4.63
1	24	3	10	4	3	4	0	0	0	5	0	0	16	3	6	6	6	6	6	2	6	41	0	0	3	0	1	4	4	4	5	5	4.5	5	4	5	5	4.75	4	5	4	4	4.25	4	3	5	5	4.25	4.63
1	31	3	12	0	1	0	6	3	0	0	6	0	16	6	0	0	0	6	3	3	6	24	1	1	6	2	0	10	6	6	6	6	6	5	5	5	5	5	6	6	6	5	5.75	5	4	4	5	4.5	5.5
2	54	5	4	2	2	1	1	0	0	0	0	0	6	6	6	6	6	5	6	6	6	47	0	0	0	0	0	0	4	4	4	4	4	4	4	4	3	3.75	4	4	4	4	4	4	4	4	4	4	3.88
2	47	5	4	5	5	5	1	3	2	3	0	2	26	3	3	5	3	1	6	5	5	31	0	1	1	1	0	3	4	4	4	4	4	4	4	4	3	3.75	5	4	4	5	4.5	5	3	3	5	4	3.88
2	24	3	6	4	5	3	0	5	0	4	0	0	21	2	6	5	2	6	6	6	5	38	0	3	4	0	0	7	3	4	3	4	3.5	5	4	3	6	4.5	5	3	2	2	3	2	2	3	3	2.5	4
2	30	3	12	2	3	0	1	1	2	3	0	0	12	5	6	6	6	5	6	6	6	46	0	1	0	0	0	1	4	4	4	6	4.5	4	4	3	3	3.5	5	4	3	4	4	2	2	2	4	2.5	4
2	27	3	3	2	2	2	1	1	3	1	1	0	13	5	6	6	5	6	6	5	6	45	0	0	1	0	0	1	6	6	6	5	5.75	4	4	3	3	3.5	2	5	5	5	4.25	3	3	5	4	3.75	4.63
2	34	3	9	0	0	2	0	0	0	1	0	1	4	5	6	4	3	6	6	5	6	41	0	0	1	0	0	1	4	5	5	3	4.25	3	3	3	3	3	5	5	4	3	4.25	5	2	3	4	3.5	3.63
2	29	3	10	5	5	6	0	5	5	5	3	3	37	5	6	6	3	6	6	6	3	41	0	0	0	0	3	3	1	1	2	1	1.25	4	1	3	3	2.75	1	1	4	4	2.5	4	1	3	3	2.75	2
1	32	3	24	5	6	6	6	5	4	4	3	2	41	4	6	5	5	6	4	6	5	41	0	2	1	0	0	3	5	5	5	5	5	5	5	5	5	5	5	4	2	6	4.25	2	5	3	3	3.25	5
1	24	3	1	2	4	3	0	5	0	3	1	0	18	5	6	6	5	6	6	5	5	44	0	0	0	0	0	0	2	1	2	1	1.5	1	2	1	2	1.5	4	5	5	5	4.75	6	5	6	6	5.75	1.5
1	50	3	10	1	0	0	0	0	0	0	0	0	1	6	6	6	6	6	6	6	6	48	0	0	0	0	0	0	5	5	5	5	5	5	4	5	4	4.5	4	5	5	4	4.5	5	5	5	5	5	4.75
1	28	3	10	1	3	3	0	1	0	1	1	5	15	5	6	6	5	5	5	4	6	42	0	0	0	0	0	0	5	5	5	5	5	4	4	4	2	3.5	3	4	5	5	4.25	5	5	5	5	5	4.25
1	27	3	3	0	0	0	0	0	0	0	0	0	0	5	6	6	6	6	6	5	6	46	0	0	0	0	5	5	5	5	5	5	5	4	3	4	4	3.75	3	3	4	4	3.5	4	4	4	4	4	4.38
1	28	3	11	0	4	2	0	0	0	1	0	0	7	5	6	6	5	5	6	6	6	45	0	0	0	0	1	1	4	4	4	5	4.25	4	3	4	4	3.75	5	4	4	5	4.5	5	5	3	4	4.25	4
1	26	3	8	0	5	0	0	0	0	0	0	0	5	5	6	6	6	6	6	6	6	47	0	0	0	0	0	0	6	6	6	4	5.5	6	4	5	5	5	5	6	6	4	5.25	5	1	5	5	4	5.25
1	33	3	24	1	1	1	1	1	1	1	1	0	8	1	6	5	5	5	5	5	6	38	0	0	1	1	0	2	6	6	6	5	5.75	4	3	4	2	3.25	5	5	5	5	5	5	3	4	5	4.25	4.5
1	31	3	36	3	3	1	1	1	0	1	1	0	11	3	5	1	5	1	6	6	6	33	1	5	1	0	0	7	5	6	4	5	5	5	4	5	2	4	4	5	2	2	3.25	5	1	2	3	2.75	4.5
1	47	3	108	0	1	1	0	0	0	2	0	0	4	6	6	6	6	6	6	1	6	43	0	0	1	0	0	1	2	5	5	2	3.5	5	6	6	5	5.5	5	5	6	6	5.5	5	4	4	4	4.25	4.5
2	47	1	5	0	0	0	0	0	0	0	0	0	0	1	6	6	6	6	6	2	6	39	0	2	0	0	0	2	4	4	4	4	4	5	5	5	4	4.75	4	4	2	4	3.5	4	5	4	4	4.25	4.38
2	31	1	9	0	0	0	0	0	0	0	0	0	0	6	6	6	6	6	6	6	5	47	0	0	0	0	0	0	4	5	4	4	4.25	4	4	4	4	4	6	5	6	6	5.75	6	4	4	5	4.75	4.13
2	38	1	24	1	2	3	1	0	0	1	0	0	8	6	6	3	3	6	5	6	6	41	0	0	1	0	1	2	4	5	4	5	4.5	5	4	4	2	3.75	4	5	5	4	4.5	3	4	4	5	4	4.13
2	35	1	20	2	3	3	0	2	2	0	2	5	19	2	6	3	5	5	6	6	1	34	0	0	0	0	0	0	4	3	4	1	3	3	2	3	3	2.75	3	3	4	4	3.5	3	1	3	5	3	2.88
2	42	1	40	0	2	1	0	0	1	0	0	0	4	6	6	6	6	6	6	6	6	48	0	0	1	0	3	4	4	6	4	3	4.25	5	4	4	5	4.5	2	3	4	3	3	3	2	3	3	2.75	4.38
2	43	1	12	0	1	0	0	0	0	0	0	0	1	1	6	6	6	6	6	6	6	43	0	6	0	6	0	12	6	4	6	6	5.5	3	3	6	4	4	5	5	5	5	5	4	3	4	5	4	4.75
1	27	1	36	0	1	1	0	1	0	6	1	0	10	6	6	0	3	6	6	6	6	39	0	0	0	0	0	0	3	5	6	6	5	5	3	1	1	2.5	4	3	3	5	3.75	4	6	3	6	4.75	3.75
1	43	1	132	2	2	2	2	0	1	1	1	0	11	2	6	6	6	6	6	6	6	44	0	0	1	0	0	1	6	5	5	5	5.25	2	3	3	5	3.25	3	4	5	4	4	3	3	3	5	3.5	4.25
1	42	1	9	0	1	0	0	0	0	3	0	0	4	0	6	6	6	6	6	6	6	42	0	0	0	0	0	0	5	6	2	5	4.5	3	5	2	2	3	4	2	3	2	2.75	2	2	2	4	2.5	3.75
1	42	1	15	1	0	1	0	0	0	0	0	0	2	2	6	2	6	6	6	6	6	40	0	0	0	0	0	0	3	5	5	4	4.25	3	4	3	4	3.5	3	3	3	4	3.25	4	4	3	3	3.5	3.88
2	45	5	5	3	4	5	0	0	0	3	0	0	15	6	6	6	6	6	6	6	6	48	0	0	2	0	0	2	5	6	6	4	5.25	5	5	6	5	5.25	5	6	4	5	5	4	3	3	5	3.75	5.25
2	23	5	17	1	5	0	1	0	1	1	0	0	9	3	6	6	5	6	6	6	6	44	0	1	0	0	0	1	6	6	5	3	5	2	4	2	2	2.5	4	6	3	6	4.75	6	6	1	5	4.5	3.75
1	34	5	48	2	3	2	4	3	3	3	4	3	27	3	4	3	2	2	4	3	2	23	3	3	4	3	2	15	6	5	5	5	5.25	5	3	3	2	3.25	5	5	4	3	4.25	3	3	3	3	3	4.25
2	34	4	11	1	2	1	1	0	1	1	2	0	9	5	3	4	6	5	2	5	5	35	0	0	1	0	1	2	6	5	6	5	5.5	5	5	5	4	4.75	4	5	4	5	4.5	6	5	4	5	5	5.13
2	37	4	11	1	2	2	3	2	4	3	2	3	22	3	3	3	4	3	2	2	3	23	3	5	4	3	4	19	5	6	5	5	5.25	5	5	4	3	4.25	5	6	4	4	4.75	3	2	3	6	3.5	4.75
2	43	4	18	1	2	2	0	0	3	0	2	0	10	2	5	4	5	5	3	3	6	33	0	0	0	0	0	0	5	4	4	3	4	4	3	4	2	3.25	5	5	5	2	4.25	3	3	4	4	3.5	3.63
2	41	4	24	1	0	0	0	0	2	0	0	0	3	5	5	4	4	5	5	5	6	39	0	1	1	0	0	2	6	4	4	4	4.5	5	3	6	6	5	5	5	5	5	5	3	5	4	4	4	4.75
1	40	4	24	1	4	5	1	1	1	5	0	1	19	6	6	5	5	6	5	5	6	44	0	1	2	0	1	4	4	4	4	4	4	4	3	3	3	3.25	4	4	3	4	3.75	4	2	3	3	3	3.63
2	30	6	10	2	1	1	0	0	0	0	0	0	4	3	4	0	6	6	6	4	6	35	0	0	0	0	0	0	3	5	4	2	3.5	5	4	3	4	4	2	3	2	3	2.5	4	2	5	5	4	3.75
2	29	6	12	1	1	0	0	0	0	0	0	0	2	3	6	3	6	5	6	6	6	41	0	0	1	0	0	1	3	5	4	3	3.75	2	3	4	3	3	2	2	3	3	2.5	4	3	4	2	3.25	3.38
2	50	6	24	2	3	0	3	2	0	0	0	3	13	6	6	6	6	6	6	6	6	48	0	0	3	0	0	3	3	3	4	3	3.25	3	2	3	2	2.5	4	4	3	3	3.5	3	2	1	2	2	2.88
2	24	1	4	1	5	3	0	2	1	0	1	1	14	6	5	6	5	5	6	6	0	39	1	4	3	0	0	8	5	6	5	5	5.25	3	4	2	5	3.5	3	5	2	1	2.75	6	3	1	2	3	4.38
1	39	2	24	2	6	3	0	3	1	5	0	3	23	4	6	3	3	5	6	6	5	38	0	0	4	0	0	4	4	4	4	2	3.5	4	3	4	3	3.5	4	4	5	2	3.75	3	2	2	4	2.75	3.5
1	63	2	5	0	2	0	0	0	0	0	0	0	2	2	5	6	6	6	6	6	6	43	0	0	0	0	0	0	4	5	2	6	4.25	5	5	6	1	4.25	1	4	6	1	3	1	6	1	5	3.25	4.25
1	25	3	12	0	0	0	0	0	0	5	0	0	5	6	0	5	6	6	5	1	6	35	0	2	6	0	0	8	3	5	5	5	4.5	4	5	5	5	4.75	4	5	4	3	4	6	5	6	6	5.75	4.63
2	29	6	2	0	1	1	0	0	0	1	0	0	3	5	6	5	6	6	6	6	6	46	0	0	0	0	0	0	4	6	4	3	4.25	6	6	6	4	5.5	1	3	2	2	2	2	3	4	6	3.75	4.88
1	36	3	30	1	3	2	4	3	2	4	1	2	22	6	6	6	6	6	6	6	6	48	0	0	2	0	1	3	6	4	6	4	5	6	3	5	5	4.75	3	4	1	3	2.75	2	1	1	3	1.75	4.88
2	50	5	24	5	5	4	1	0	0	3	0	0	18	2	6	3	5	5	3	1	6	31	0	0	0	0	0	0	3	4	4	3	3.5	3	3	4	3	3.25	3	4	4	2	3.25	3	2	4	2	2.75	3.38
2	54	3	17	0	1	1	0	0	0	1	0	0	3	6	6	6	6	6	6	6	6	48	0	0	0	0	0	0	4	5	5	5	4.75	4	4	4	3	3.75	3	6	4	4	4.25	3	2	2	3	2.5	4.25
2	42	1	45	0	2	1	0	0	1	0	0	0	4	6	6	6	6	6	6	6	6	48	0	0	1	0	3	4	5	4	4	4	4.25	2	4	4	4	3.5	3	5	4	3	3.75	3	2	3	3	2.75	3.88
[truncated: 28 more columns]
